# Supplementary material for: Nucleofection of Rat Pheochromocytoma PC-12 Cells with Human Mutated Beta-Amyloid Precursor Protein Gene (APP-sw) Leads to Reduced Viability, Autophagy-Like Process, and Increased Expression and Secretion of Beta Amyloid
Source: Hindawi journal article supplement (doi:10.1155/2015/746092), 2015-01-01
Supplement: f1 [file 746092.f1.zip]

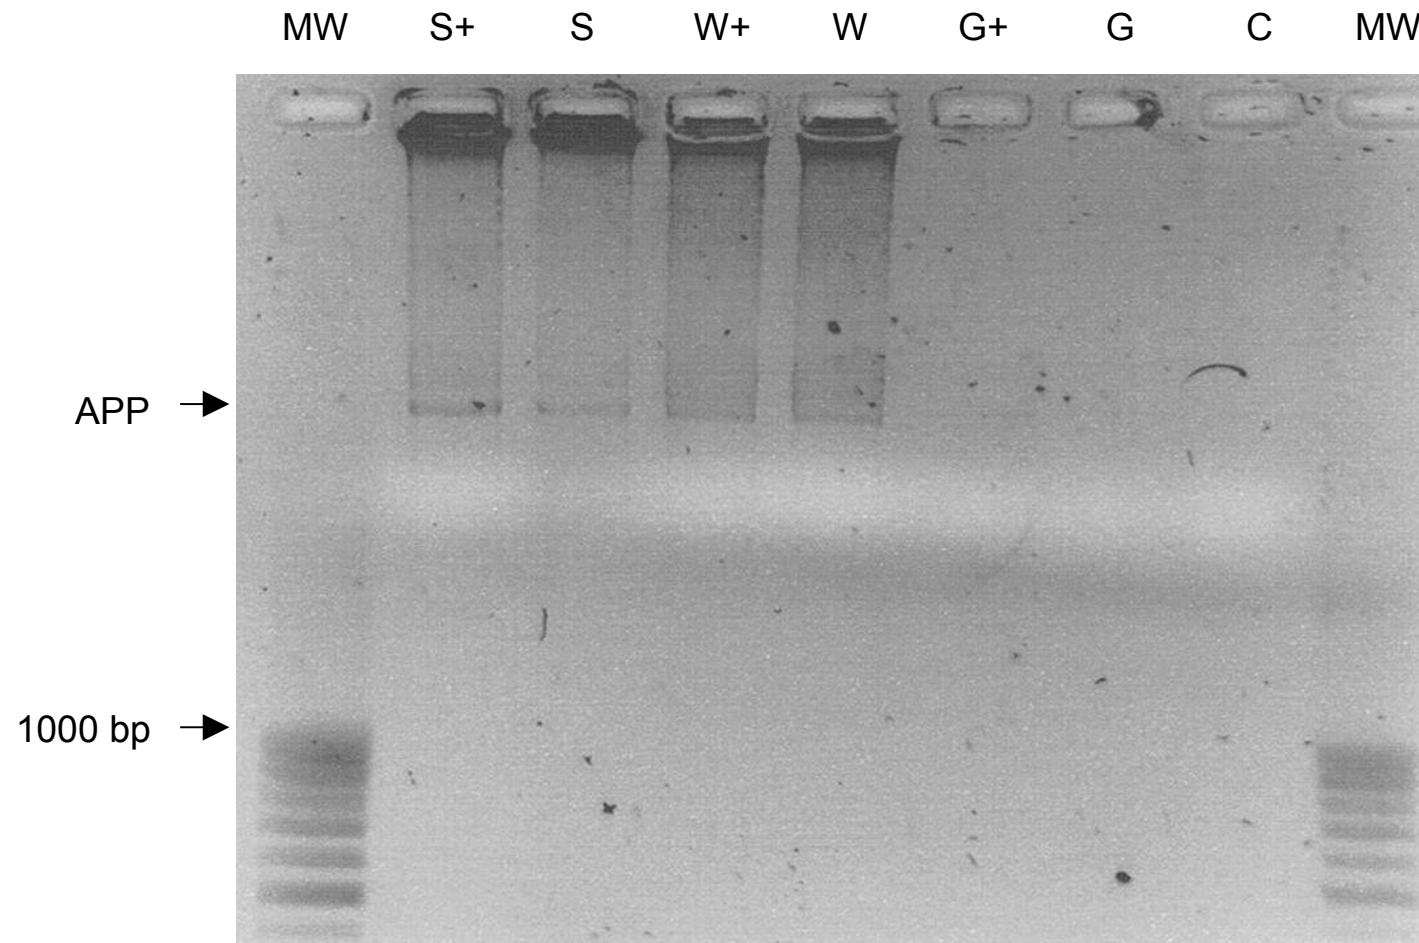

| Flanking region             | Primers and their sequences                           |
|-----------------------------|-------------------------------------------------------|
| VP1.5 (forward seq. primer) | 5' GGACTTTCCAAAATGTCTG 3' $T_m = 51^{\circ}\text{C}$  |
| XL39 (reverse seq. primer)  | 5' ATTAGGACAAGGCTGGTGGG 3' $T_m = 60^{\circ}\text{C}$ |
