# Supplementary figures and images for: Nucleofection of Rat Pheochromocytoma PC-12 Cells with Human Mutated Beta-Amyloid Precursor Protein Gene (APP-sw) Leads to Reduced Viability, Autophagy-Like Process, and Increased Expression and Secretion of Beta Amyloid
Source: Hindawi journal article supplement (doi:10.1155/2015/746092), 2015-01-01

A

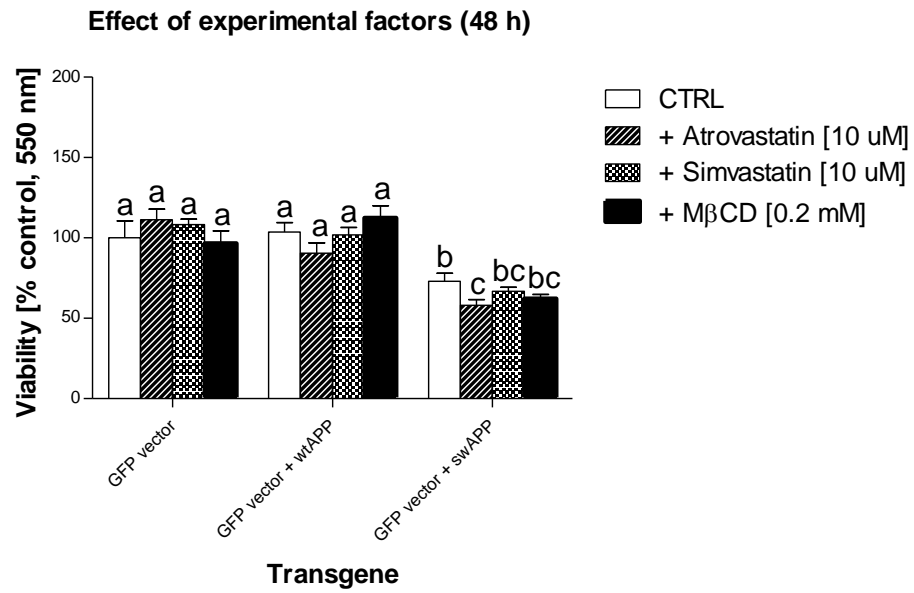

B

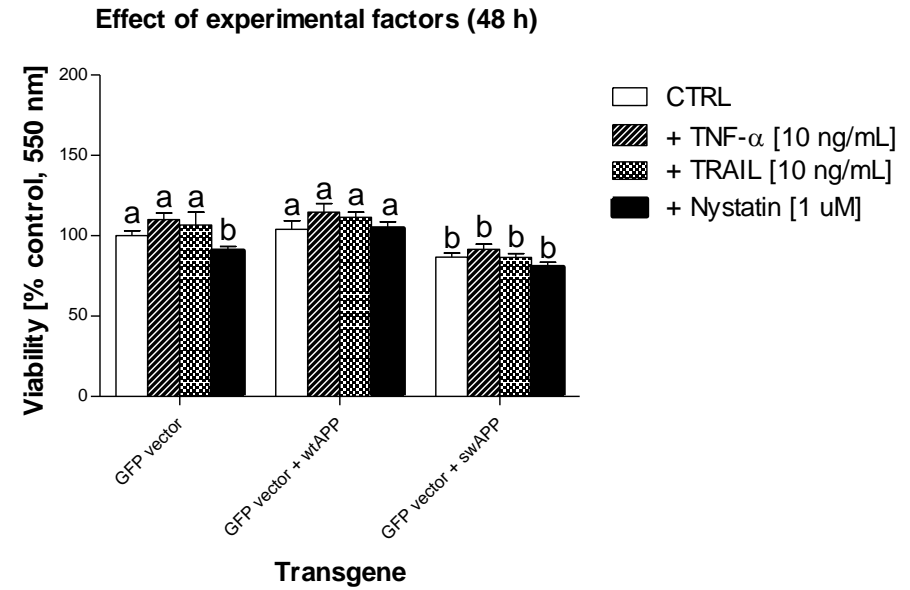

Supplement: f1 [file 746092.f1.zip]

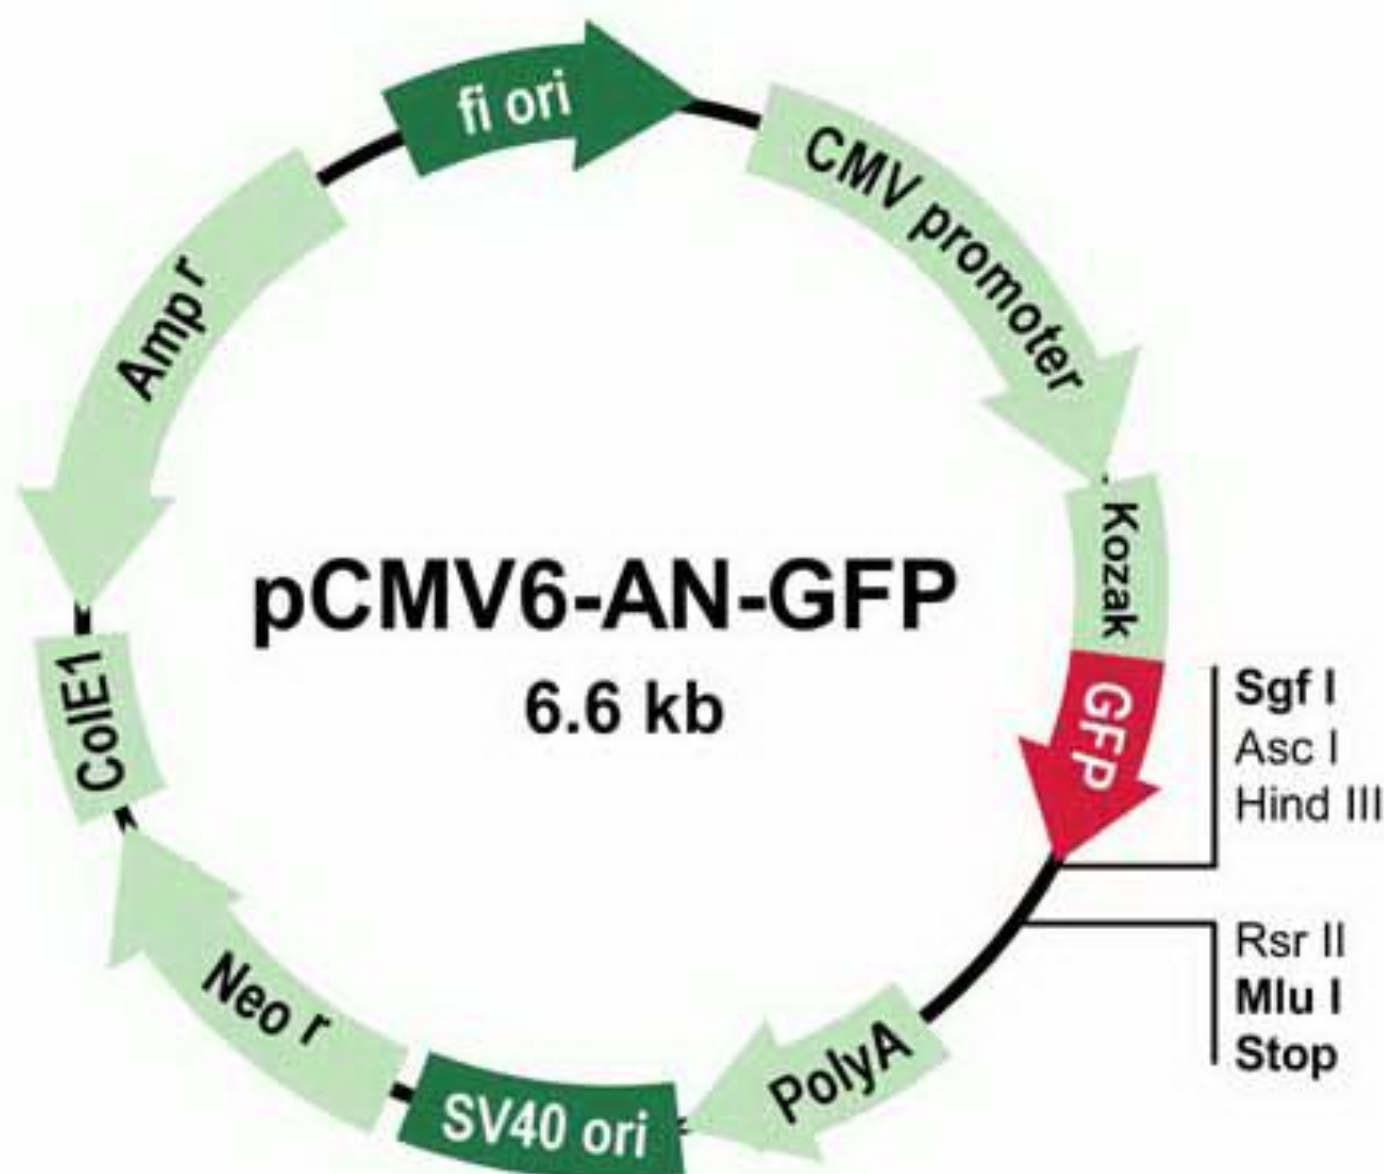

Supplement: f1 [file 746092.f1.zip]

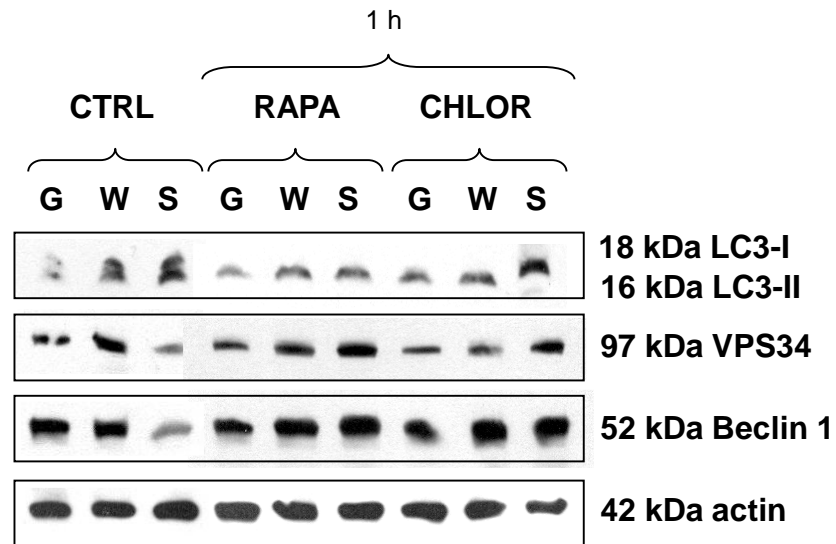

Supplement: f1 [file 746092.f1.zip]

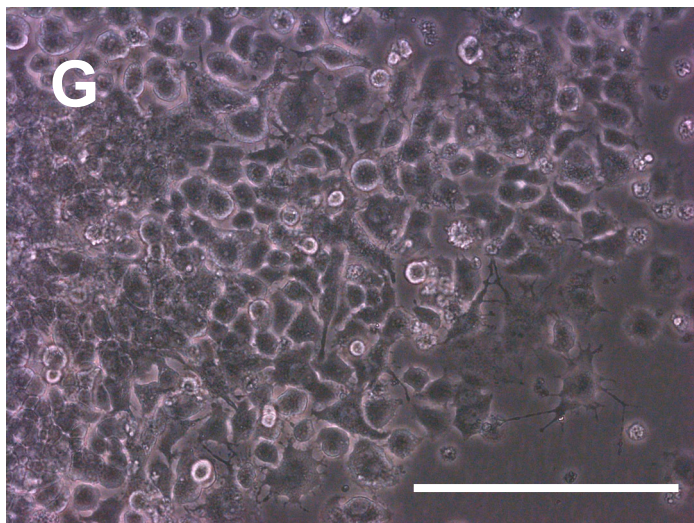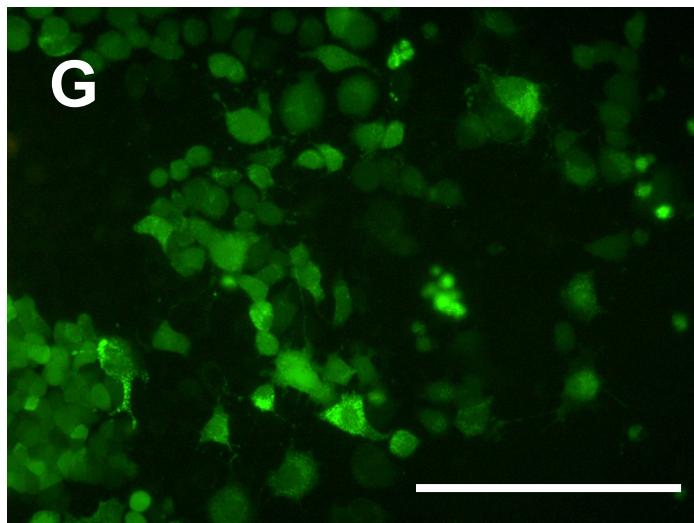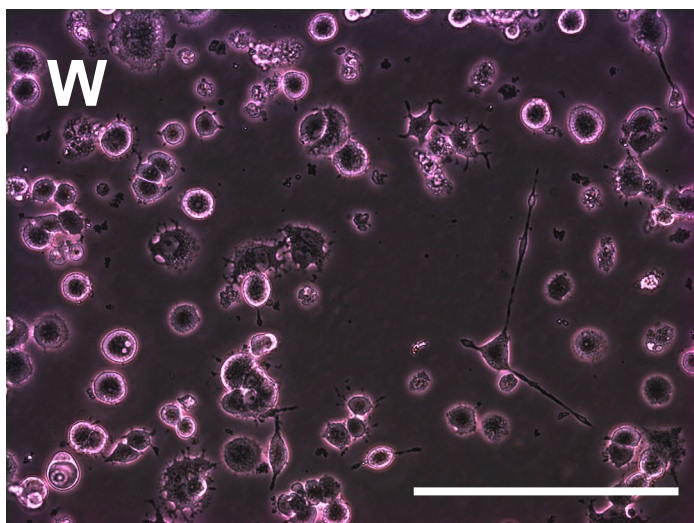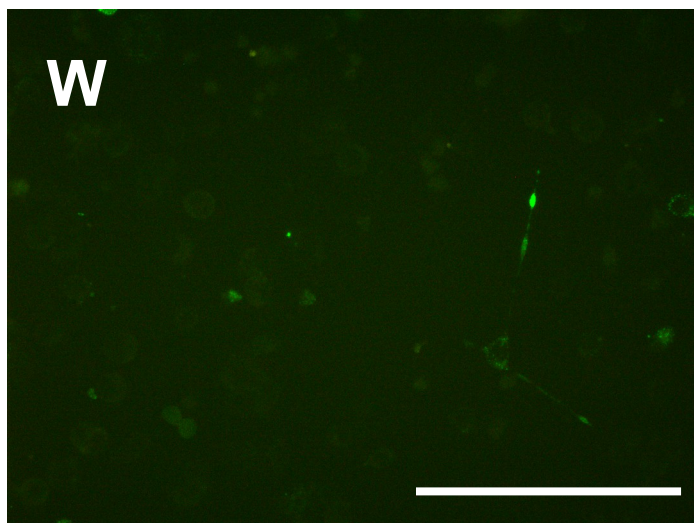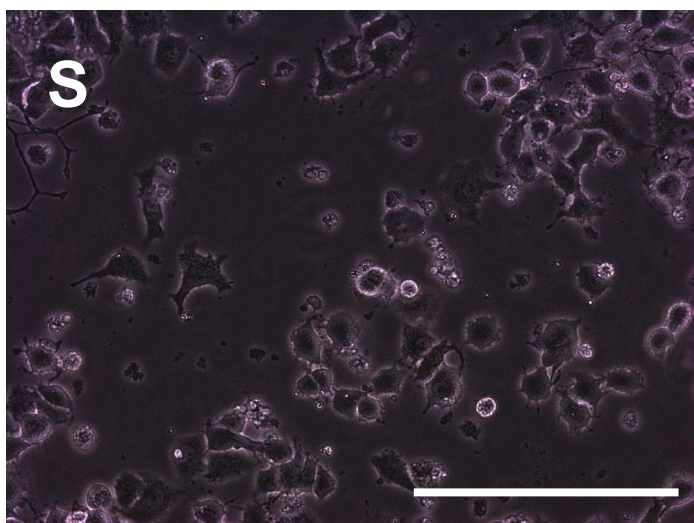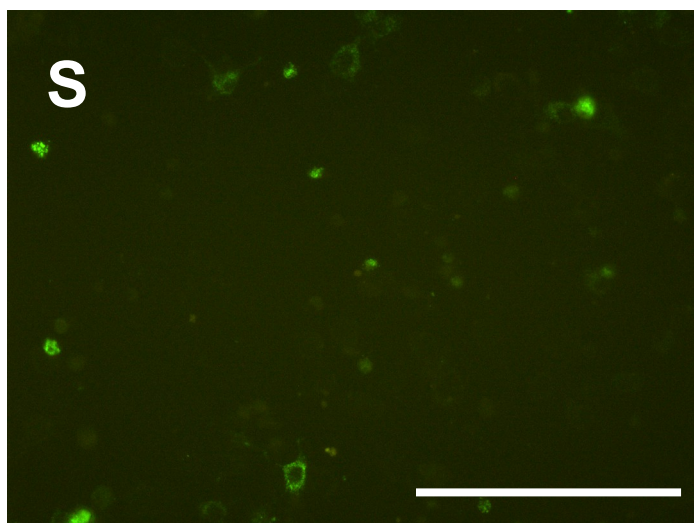

Supplement: f1 [file 746092.f1.zip]
